# Supplementary material for: Note—Further Improvements on Base-Stock Approximations for Independent Stochastic Lead Times with Order Crossover
Source: Atypon-hosted journal article supplement (doi:10.1287/msom.1070.0160), 2007-12-19
Supplement: msom.1070.0160-sm-note--further_improvements.pdf [file msom.1070.0160-sm-note--further_improvements.pdf]

Online Appendix to Accompany  
Further Improvements on Base-Stock Approximations  
for Independent Stochastic Lead Times  
with Order Crossover

Lawrence W. Robinson  
Johnson Graduate School of Management  
Cornell University  
Ithaca, New York 14853-6201  
lwr2@cornell.edu

James R. Bradley  
Mason School of Business  
College of William and Mary  
Williamsburg, Virginia 23187-8795  
james.bradley@mason.wm.edu

January 22, 2007



This online appendix contains three technical topics in support of the paper “Further Improvements on Base-Stock Approximations for Independent Stochastic Lead Times with Order Crossover.” The first section describes how to fit a beta distribution to any four moments. The second section provides the proof of Theorem 1, while the third section summarizes the cost performance of the various heuristics.

## 1 Fitting the Parameters of a Beta Distribution

Given the first four moments ( $\mu_L$ ,  $\sigma_L$ ,  $\alpha_3$ , and  $\alpha_4$ ) of a probability distribution, the transformation of Elderton and Johnson (1969), as cited in Johnson *et al.* (1995), can be used to compute the four parameters ( $\alpha, \beta, \ell, u$ ) that define the matching beta distribution as follows:

$$\begin{aligned}\alpha &\doteq \frac{1}{2}\rho \left[ 1 - (\rho + 2) \alpha_3 \div \sqrt{(\rho + 2)^2 \alpha_3^2 + 16(\rho + 1)} \right] \\ \beta &\doteq \rho - \alpha , \\ \text{where } \rho &\doteq \frac{6(\alpha_4 - \alpha_3^2 - 1)}{6 + 3\alpha_3^2 - 2\alpha_4} = \alpha + \beta , \text{ and} \\ \ell &\doteq \mu_L - w\alpha/\rho \\ u &\doteq \ell + w , \\ \text{where } w &\doteq \sigma_L \cdot \rho \sqrt{\frac{\rho + 1}{\alpha\beta}} = u - \ell .\end{aligned}$$

## 2 Proof of Theorem 1

**Theorem 1** *For any discrete distribution of the non-negative lead time,  $\sigma_N^2 \leq \left( \frac{c_v^2 + 1/9}{c_v^2 + 1} \right) \mu_L$ .*

**Proof:** Because Bradley and Robinson (2005) showed that the “quasi-uniform” discrete distribution for the lead time maximized the variance of the number of orders outstanding  $\sigma_N^2$ , it is sufficient to show that Theorem 1 holds for the family of quasi-uniform distributions.

Note that we can rewrite this upper bound as

$$\left( \frac{c_v^2 + 1/9}{c_v^2 + 1} \right) \mu_L = \left( 1 - \frac{8\mu_L^2}{9(\sigma_L^2 + \mu_L^2)} \right) \mu_L ; \quad (1)$$

taking the partial derivative with respect to  $\mu_L$  yields, after some simplification,

$$\frac{\partial}{\partial \mu_L} \left( 1 - \frac{8\mu_L^2}{9(\sigma_L^2 + \mu_L^2)} \right) \mu_L = \left( \frac{\mu_L^2/3 - \sigma_L^2}{\sigma_L^2 + \mu_L^2} \right)^2 \geq 0 ,$$

showing that the bound is increasing in  $\mu_L$ . This implies that we need test the bound only for those quasi-uniform distributions that have a positive mass on zero. (We can translate other distributions towards zero, which would tighten this upper bound while leaving  $\sigma_N^2$  unchanged.)

It is possible to define these quasi-uniform probability distributions by two parameters  $p$  and  $n$  as follows. Define  $p \in [0, 1)$  to be a point-mass on 0, with the remaining mass of  $1 - p$  uniformly distributed over  $[0, n]$  and then aggregated onto the nearest integer. (Because of this aggregation,  $p$  and  $n$  are slightly different than their counterparts  $p_0$  and  $n_0$  in the continuous distribution.) For any real number  $n$ , define  $\langle n \rangle \doteq \lfloor n + 0.5 \rfloor$  to be its nearest integer. Then the discrete distribution  $\{f_l\}$  defined by  $(p, n)$  will be:

$$\begin{aligned} f_0 &= p + \frac{1-p}{2n} \\ f_l &= \frac{1-p}{n} \quad l = 1, \dots, \langle n \rangle - 1 \\ f_{\langle n \rangle} &= \frac{1-p}{n} \left[ n - \left( \langle n \rangle - \frac{1}{2} \right) \right] , \end{aligned}$$

with  $f_l = 0$  outside of this range. In order to allow  $f_0$  to assume values in the range  $(0, \frac{1}{2n})$ , we generalize the definition of  $p$  to allow it to take on negative values, so that  $p \in (-\frac{1}{2n-1}, 1)$ ;  $f_l$  and  $f_{\langle n \rangle}$  are both always well-defined when  $n > 1.5$ . As a function of  $p$  and  $n$ ,

$$\begin{aligned} \mu_L &= \sum_{l=1}^{\langle n \rangle - 1} l \left( \frac{1-p}{n} \right) + \langle n \rangle \left( \frac{1-p}{n} \right) \left[ n - \left( \langle n \rangle - \frac{1}{2} \right) \right] \\ &= (1-p) \langle n \rangle \left[ \frac{2n - \langle n \rangle}{2n} \right] , \end{aligned}$$

and

$$\begin{aligned} \sigma_L^2 + \mu_L^2 &= \sum_{l=1}^{\langle n \rangle - 1} l^2 \left( \frac{1-p}{n} \right) + \langle n \rangle^2 \left( \frac{1-p}{n} \right) \left[ n - \left( \langle n \rangle - \frac{1}{2} \right) \right]^2 \\ &= \left( \frac{1-p}{n} \right) \left[ \frac{(\langle n \rangle - 1) \langle n \rangle (2 \langle n \rangle - 1)}{6} + \langle n \rangle^2 n - \langle n \rangle^3 + \frac{1}{2} \langle n \rangle^2 \right] \\ &= \left( \frac{1-p}{6n} \right) \langle n \rangle \left[ 1 + 6 \langle n \rangle n - 4 \langle n \rangle^2 \right] , \end{aligned}$$

with

$$\begin{aligned}
\sigma_N^2 &= \sum_{l=0}^{\infty} F_l (1 - F_l) \\
&= \sum_{l=0}^{\langle n \rangle - 1} \left[ p + \frac{1-p}{2n} + l \left( \frac{1-p}{n} \right) \right] \left[ 1 - p - \frac{1-p}{2n} - l \left( \frac{1-p}{n} \right) \right] \\
&= \left( \frac{1-p}{4n^2} \right) \sum_{l=0}^{\langle n \rangle - 1} (2np + 1 - p) (2n - 1) \\
&\quad + \left( \frac{1-p}{4n^2} \right) \sum_{l=0}^{\langle n \rangle - 1} [-2(2np + 1 - p) + 2(1-p)(2n - 1)] l \\
&\quad - \left( \frac{1-p}{4n^2} \right) \sum_{l=0}^{\langle n \rangle - 1} 4(1-p) l^2 \\
&= \left( \frac{1-p}{12n^2} \right) \langle n \rangle [12n^2 p + 1 - p + 6n \langle n \rangle (1 - 2p) - 4 \langle n \rangle^2 (1 - p)] \\
&= \mu_L \left[ 1 - \left( \frac{1-p}{6n} \right) \left( \frac{12n [n - \langle n \rangle] + 4 \langle n \rangle^2 - 1}{2n - \langle n \rangle} \right) \right]. \tag{2}
\end{aligned}$$

In order to prove Theorem 1, we need to compare (2) with (1):

$$\begin{aligned}
\mu_L \left[ 1 - \left( \frac{1-p}{6n} \right) \left( \frac{12n [n - \langle n \rangle] + 4 \langle n \rangle^2 - 1}{2n - \langle n \rangle} \right) \right] &\leq \left( 1 - \frac{8\mu_L^2}{9(\sigma_L^2 + \mu_L^2)} \right) \mu_L \\
\left( \frac{1-p}{2n} \right) \left( \frac{12n [n - \langle n \rangle] + 4 \langle n \rangle^2 - 1}{2n - \langle n \rangle} \right) &\geq \frac{8\mu_L^2}{3(\sigma_L^2 + \mu_L^2)} \\
\frac{12n [n - \langle n \rangle] + 4 \langle n \rangle^2 - 1}{2n - \langle n \rangle} &\geq \frac{8 \langle n \rangle [2n - \langle n \rangle]^2}{1 + 6 \langle n \rangle n - 4 \langle n \rangle^2}.
\end{aligned}$$

Note that  $p$  has dropped out of this comparison. Cross-multiplying, expanding, and simplifying leads in a straightforward if tedious manner to the equivalent inequality:

$$8 \langle n \rangle [n - \langle n \rangle]^3 + 12 [n - \langle n \rangle]^2 + 6 \langle n \rangle [n - \langle n \rangle] + 2 \langle n \rangle^2 - 1 \geq 0. \tag{3}$$

At this point we replace  $n - \langle n \rangle$  with  $\varepsilon$ , representing the difference between  $n$  and its closest integer value. It is clear that  $\varepsilon \in [-\frac{1}{2}, \frac{1}{2})$ . With this substitution, (3) becomes

$$8 \langle n \rangle \varepsilon^3 + 12\varepsilon^2 + 6 \langle n \rangle \varepsilon + 2 \langle n \rangle^2 - 1 \geq 0. \tag{4}$$

We need to show that (4) holds for all  $\langle n \rangle \geq 1$  and all  $\varepsilon \in [-\frac{1}{2}, \frac{1}{2}]$ ; we start with the latter. Taking the partial derivative of (4) with respect to  $\varepsilon$  yields

$$\begin{aligned} & 24 \langle n \rangle \varepsilon^2 + 24\varepsilon + 6 \langle n \rangle \\ &= 6 [(\langle n \rangle - 1) (4\varepsilon^2 + 1) + (2\varepsilon + 1)^2] , \end{aligned}$$

which is non-negative since  $\langle n \rangle \geq 1$ . Thus the left-hand side of (4) is increasing in  $\varepsilon$ ; to show that (4) holds for all  $\varepsilon$ , it is sufficient to show that it holds for the lowest feasible value of  $\varepsilon$ :  $\varepsilon = -\frac{1}{2}$ . Making this substitution, (4) becomes

$$2[\langle n \rangle - 1]^2 \geq 0 ,$$

which is always true, completing the proof. ■

### 3 Heuristic Cost Performance

For ease of comparison, the numerical results from Bradley and Robinson (2005) are repeated in the first six lines of Table 1. As an aside, note that many of the numbers given here are trivially different than theirs; this is because they had prematurely truncated the lead-time distribution at  $l = 100$ . This truncation was inconsequential for  $\mu_L = 6$  and 10, but not for the highly skewed lead-time distribution with  $\mu_L = 2$ , where  $F_{100}$  was only 99.925% in the worst case ( $\sigma_L = 8$ ). These minor corrections do not alter their conclusions.

Table 1  
 Summary of the Percentage Cost Increase  
 Across the Test Bed of 145,800 Parameter Combinations  
 (All numbers are in percent.)

| Distribution      | Variance <sup>1</sup>     | Mean  | Std Dev | 95%-ile | 99%-ile | Worst Case | Prob{ $\Delta=0$ } | Prob{ $\Delta\leq 1\%$ } | Prob{ $\Delta\leq 5\%$ } |
|-------------------|---------------------------|-------|---------|---------|---------|------------|--------------------|--------------------------|--------------------------|
| Normal            | LT: $\sigma_L^2$          | 63.91 | 59.91   | 179.24  | 235.62  | 286.85     | 9.97               | 14.38                    | 20.85                    |
| Normal            | Old: $\hat{\sigma}_N^2$   | 0.32  | 1.33    | 1.44    | 5.65    | 36.62      | 61.08              | 93.21                    | 98.82                    |
| Normal            | True: $\sigma_N^2$        | 0.58  | 2.25    | 2.79    | 9.51    | 61.33      | 59.30              | 87.74                    | 97.51                    |
| Neg. Bin.         | LT: $\sigma_L^2$          | 69.06 | 86.69   | 231.51  | 402.52  | 1,080.33   | 10.02              | 14.23                    | 21.49                    |
| Neg. Bin.         | Old: $\hat{\sigma}_N^2$   | 0.38  | 1.10    | 1.97    | 5.46    | 23.19      | 57.60              | 89.89                    | 98.81                    |
| Neg. Bin.         | True: $\sigma_N^2$        | 0.08  | 0.30    | 0.41    | 1.47    | 9.15       | 77.35              | 98.16                    | 99.98                    |
| Neg. Bin.         | New: $\tilde{\sigma}_N^2$ | 0.18  | 0.55    | 1.00    | 2.74    | 12.20      | 65.06              | 95.01                    | 99.80                    |
| Normal            | New: $\tilde{\sigma}_N^2$ | 0.43  | 1.94    | 2.10    | 7.89    | 61.33      | 63.71              | 91.99                    | 98.15                    |
| Lognormal         | New: $\tilde{\sigma}_N^2$ | 1.12  | 3.04    | 5.72    | 15.84   | 41.92      | 44.31              | 78.43                    | 94.18                    |
| Gamma             | New: $\tilde{\sigma}_N^2$ | 0.36  | 0.93    | 1.96    | 4.75    | 15.39      | 56.64              | 89.14                    | 99.12                    |
| Beta <sup>2</sup> | New: $\tilde{\sigma}_N^2$ | 0.13  | 0.44    | 0.60    | 1.87    | 13.05      | 64.53              | 97.42                    | 99.88                    |
| Beta <sup>3</sup> | New: $\tilde{\sigma}_N^2$ | 0.05  | 0.14    | 0.25    | 0.66    | 3.96       | 70.93              | 99.61                    | 100.00                   |

<sup>1</sup> This column identifies the variance used in place of  $\sigma_N^2$  when calculating  $\sigma_{SF}^2$ .

<sup>2</sup> For these beta distributions,  $\alpha_3 = 0.3166$  and  $\alpha_4 = 3.1199$ .

<sup>3</sup> For these beta distributions,  $\alpha_3$  and  $\alpha_4$  are approximated from  $c_v^2$  through the linear regressions

$$\hat{\alpha}_3 = 0.1156 + 2.1617 \cdot c_v^2, \text{ and}$$

$$\hat{\alpha}_4 = 2.9406 + 1.9289 \cdot c_v^2.$$

## References

- [2005] Bradley, J. R., L. W. Robinson. Improved base-stock approximations for independent stochastic lead times with order crossover. *Mfg. and Service Oper. Mgmt.*, **7** 319-329.
- [1969] Elderton, W. P., N. L. Johnson. 1969. *Systems of Frequency Curves*. Cambridge University Press, Cambridge.
- [1995] Johnson, N. L., S. Kotz, N. Balakrishnan. 1995. *Continuous Univariate Distributions*, volume 2. John Wiley & Sons, New York.
